# Supplementary material for: An exceptionally stable luminescent cadmium(ii) metal–organic framework as a dual-functional chemosensor for detecting Cr(vi) anions and nitro-containing antibiotics in aqueous media
Source: Royal Society of Chemistry journal article supplement (doi:10.1039/d0ce01721c), 2020-12-22
Supplement: d0ce01721c1.pdf [file d0ce01721c1.pdf]

*Electronic Supplementary Information (ESI) for*

**An Exceptionally Stable Luminescent Cadmium(II) Metal-Organic Framework as Dual-functional Chemoensor for Detecting Cr(VI) Anions and Nitro-containing Antibiotics in Aqueous Media**

5 Liming Fan,<sup>\*a</sup> Dongsheng Zhao,<sup>a</sup> Bei Li,<sup>a</sup> Xi Chen,<sup>b,c</sup> Feng Wang,<sup>a</sup> Yuxin Deng,<sup>a</sup> Yulan Niu<sup>\*b,c</sup>, and Xiutang Zhang<sup>\*a</sup>

<sup>a</sup> Department of Chemistry, College of Science, North University of China, Taiyuan 030051, P.R. China.

<sup>b</sup> Institute of Interface Chemistry and Engineering, Taiyuan Institute of Technology, Taiyuan 030008, P. R. China.

<sup>c</sup> School of Chemical Engineering and Technology, North University of China, Taiyuan 030051, P. R. China.

E-mail: limingfan@nuc.edu.cn; niuyulan@163.com; xiutangzhang@163.com.

10

**Table of Contents**

|                                                                                                                                                                                                                                 |   |
|---------------------------------------------------------------------------------------------------------------------------------------------------------------------------------------------------------------------------------|---|
| <b>Fig. S1</b> The IR spectrum of <b>1</b> .....                                                                                                                                                                                | 2 |
| <b>Fig. S2</b> The asymmetric unit of <b>1</b> with the coordination environments of ten crystallography independent Cd(II) cations (Symmetry codes: A $-x, 1-y, -z$ ; B $x, y, -1+z$ ; D $-x, 1-y, 1-z$ ; F $x, 1+y, z$ )..... | 2 |
| <b>Fig. S3</b> The 3D $[\text{Cd}_{10}(\text{DDB})_4]_n$ network in <b>1</b> .....                                                                                                                                              | 2 |
| 15 <b>Fig. S4</b> The PXRD patterns of <b>1</b> after immersing into the acidic/basic aqueous solutions with the pH range from 3 to 11 for 6 h, or the boiling water for 6 h.....                                               | 3 |
| <b>Fig. S5</b> TG-DTG curves for <b>1</b> .....                                                                                                                                                                                 | 3 |
| <b>Fig. S6</b> The fluorescence spectra of free $\text{H}_5\text{DDB}$ and <b>1</b> in solid state at room temperature.....                                                                                                     | 3 |
| <b>Fig. S7</b> The luminescence intensities of <b>1</b> dispersed in the 0.01M $\text{K}_n\text{X}$ aqueous solutions.....                                                                                                      | 3 |
| 20 <b>Fig. S8</b> The effect on the emission spectra of <b>1</b> in aqueous solutions with incremental addition of $\text{CrO}_4^{2-}$ anion (a) and $\text{Cr}_2\text{O}_7^{2-}$ anion (b).....                                | 4 |
| <b>Fig. S9</b> Changes of the emission intensity of <b>1</b> in 5 cycles sensing of 0.1mM $\text{CrO}_4^{2-}$ anion (a) and $\text{Cr}_2\text{O}_7^{2-}$ anion (b).....                                                         | 4 |
| <b>Fig. S10</b> The anti-interferences of <b>1</b> in sensing of Cr(VI) anions from normal anions in aqueous solutions.....                                                                                                     | 4 |
| <b>Fig. S11</b> The structures of selected ABXs in this work.....                                                                                                                                                               | 4 |
| 25 <b>Fig. S12</b> The luminescence spectra of <b>1</b> as chemosensor dispersed in 0.1 mM ABXs aqueous solutions.....                                                                                                          | 5 |
| <b>Fig. S13</b> The luminescence of <b>1</b> which were dispersed in the aqueous solution with different concentration of MND (a), DND (b), OND (c), RND (d), NFT (e), and NFZ (f).....                                         | 5 |
| <b>Fig. S14</b> The changes of the emission intensity of <b>1</b> in 5 cycles sensing of 0.1 mM MND (a), DND (b), OND (c), 30 RND (d), NFT (e), and NFZ (f).....                                                                | 5 |
| <b>Fig. S15</b> PXRD patterns of the mixture of <b>1</b> after 5 cycles sensing of Cr(VI) anions and nitro-containing ABXs in aqueous solutions.....                                                                            | 6 |
| <b>Fig. S16</b> The UV-Vis absorbance spectra of anions and ABXs in aqueous solution and the excitation spectra of <b>1</b> .....                                                                                               | 6 |
| <b>Table S1</b> Selected bond lengths (Å) and angles (°) in <b>1</b> .....                                                                                                                                                      | 7 |
| 35 <b>Table S2</b> Comparison of various CPs sensors for the detection of $\text{Cr}_2\text{O}_7^{2-}$ ion.....                                                                                                                 | 9 |
| <b>Table S3</b> Comparison of various CPs sensors for the detection of nitro-containing ABXs.....                                                                                                                               | 9 |

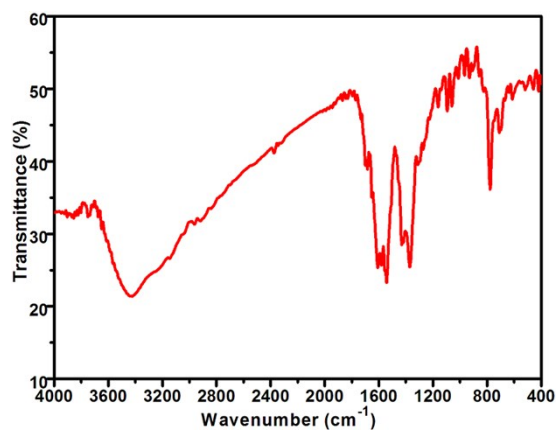

Fig. S1 The IR spectrum of **1**.

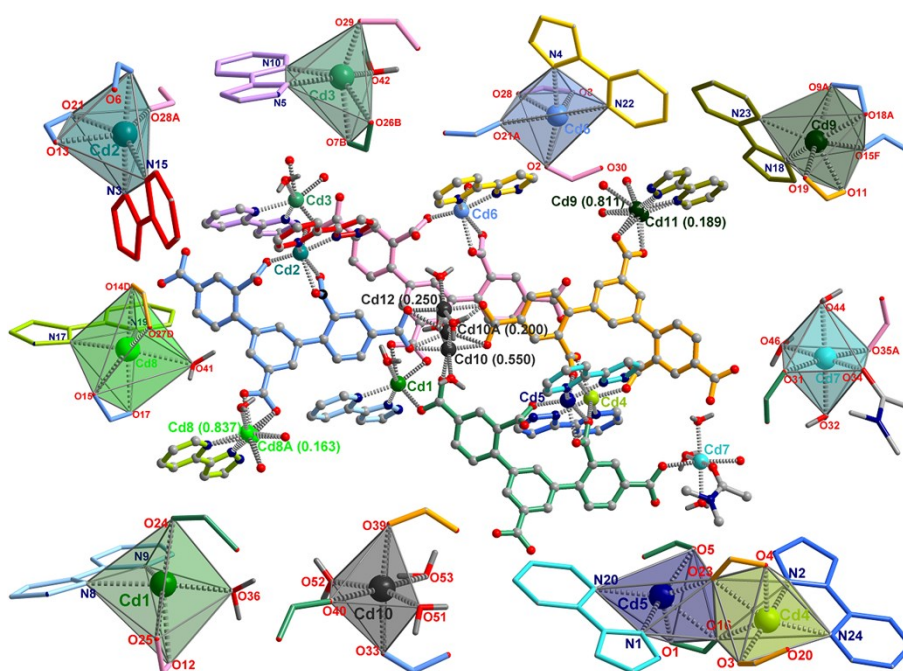

5 Fig. S2 The asymmetric unit of **1** with the coordination environments of ten crystallography independent Cd(II) cations (Symmetry codes: A  $-x, 1-y, -z$ ; B  $x, y, -1+z$ ; D  $-x, 1-y, 1-z$ ; F  $x, 1+y, z$ ).

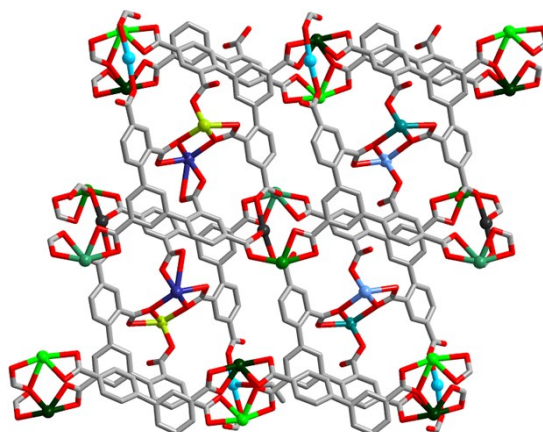

Fig. S3 The 3D  $[Cd_{10}(DDB)_4]_n$  network in **1**.

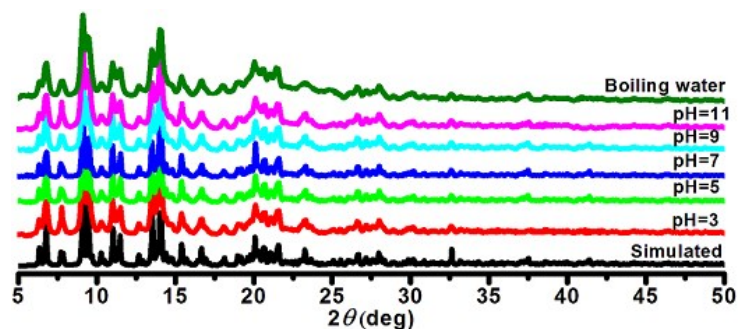

**Fig. S4** The PXRD patterns of **1** after immersing into the acidic/basic aqueous solutions with the pH range from 3 to 11 for 6 h, or the boiling water for 6 h.

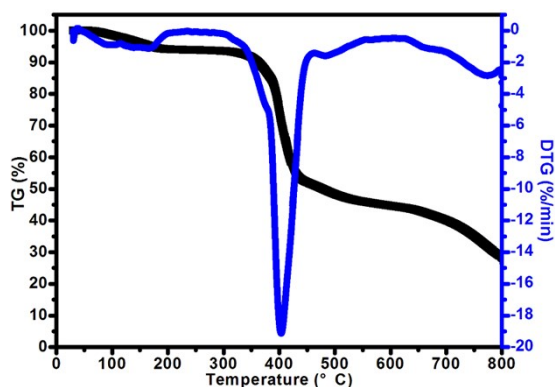

**Fig. S5** TG-DTG curves for **1**.

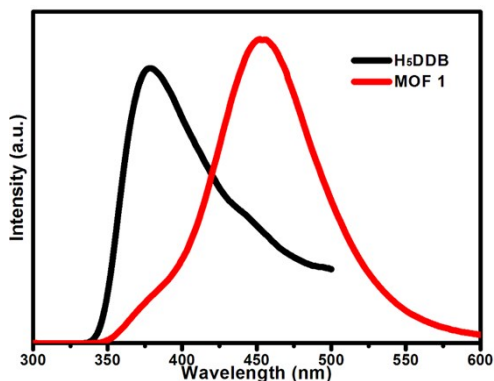

**Fig. S6** The fluorescence spectra of free  $H_5DDB$  and **1** in solid state at room temperature.

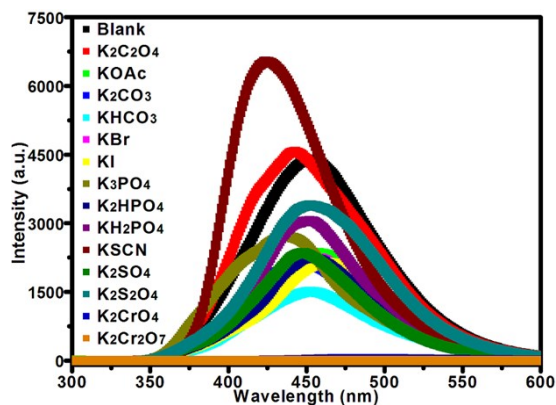

**Fig. S7** The luminescence intensities of **1** dispersed in the 0.01M  $K_nX$  aqueous solutions.

5

10

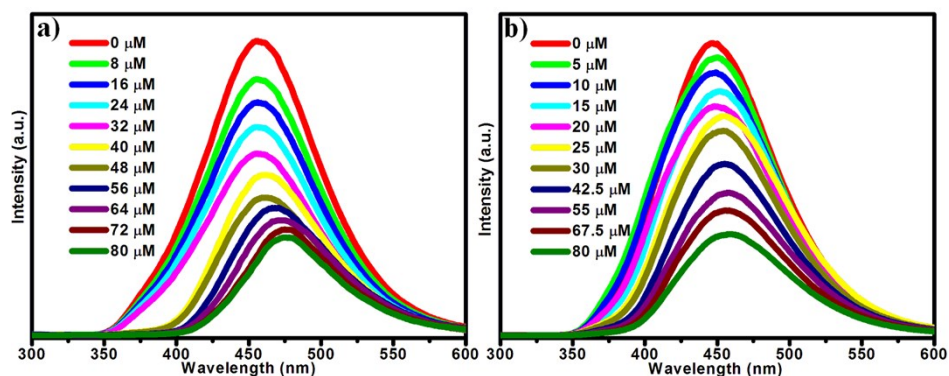

**Fig. S8** The effect on the emission spectra of **1** in aqueous solutions with incremental addition of  $\text{CrO}_4^{2-}$  anion (a) and  $\text{Cr}_2\text{O}_7^{2-}$  anion (b).

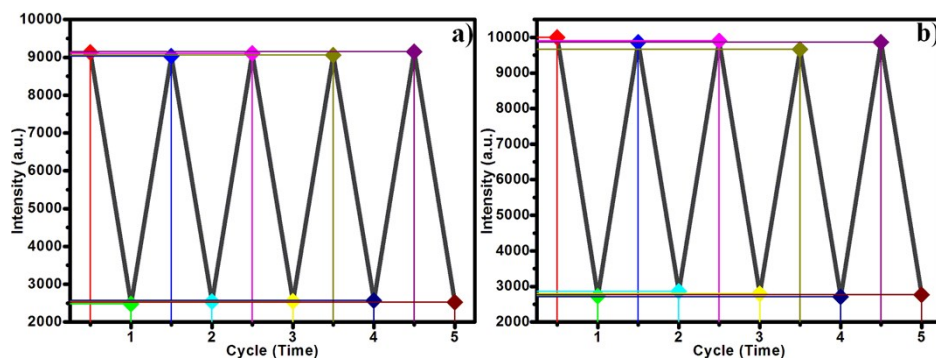

**Fig. S9** Changes of the emission intensity of **1** in 5 cycles sensing of 0.1mM  $\text{CrO}_4^{2-}$  anion (a) and  $\text{Cr}_2\text{O}_7^{2-}$  anion (b).

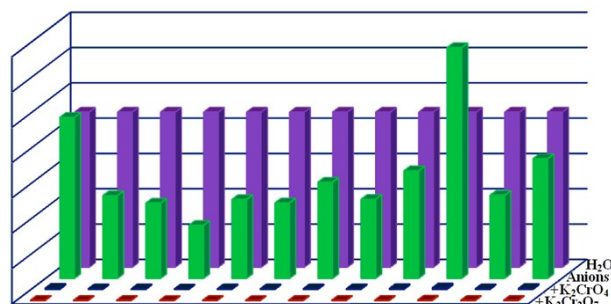

**Fig. S10** The anti-interferences of **1** in sensing of Cr(VI) anions from normal anions in aqueous solutions.

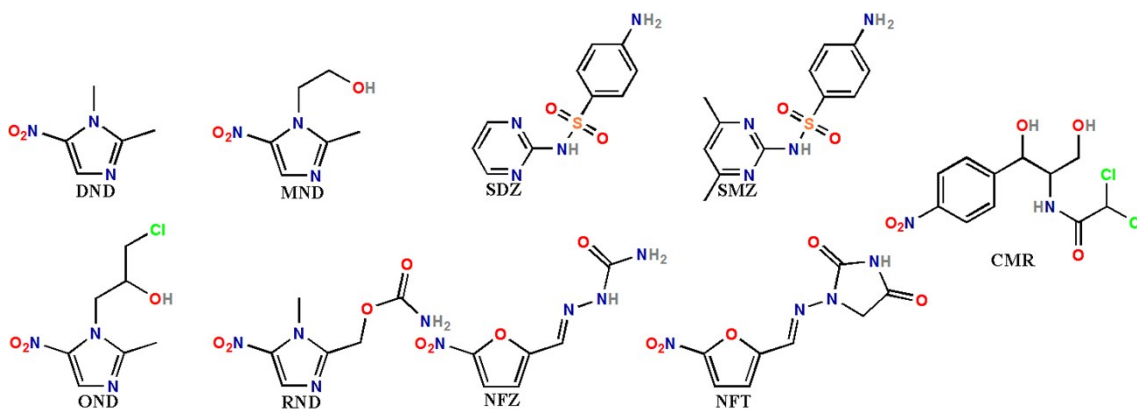

**Fig. S11** The structures of selected ABXs in this work.



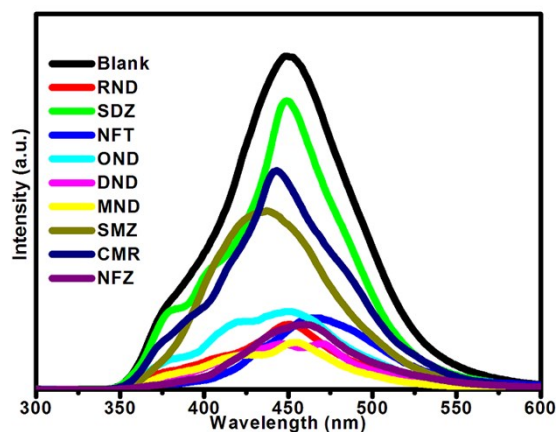

**Fig. S12** The luminescence spectra of **1** as chemosensor dispersed in 0.1 mM ABXs aqueous solutions.

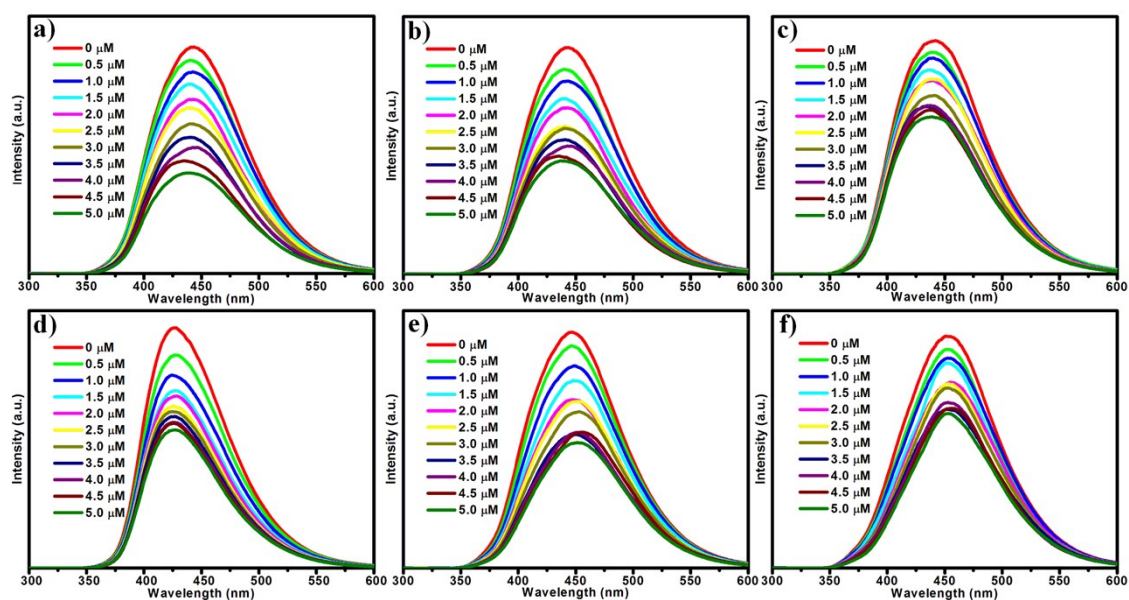

**5 Fig. S13** The luminescence of **1** which were dispersed in the aqueous solution with different concentration of MND (a), DND (b), OND (c), RND (d), NFT (e), and NFZ (f).

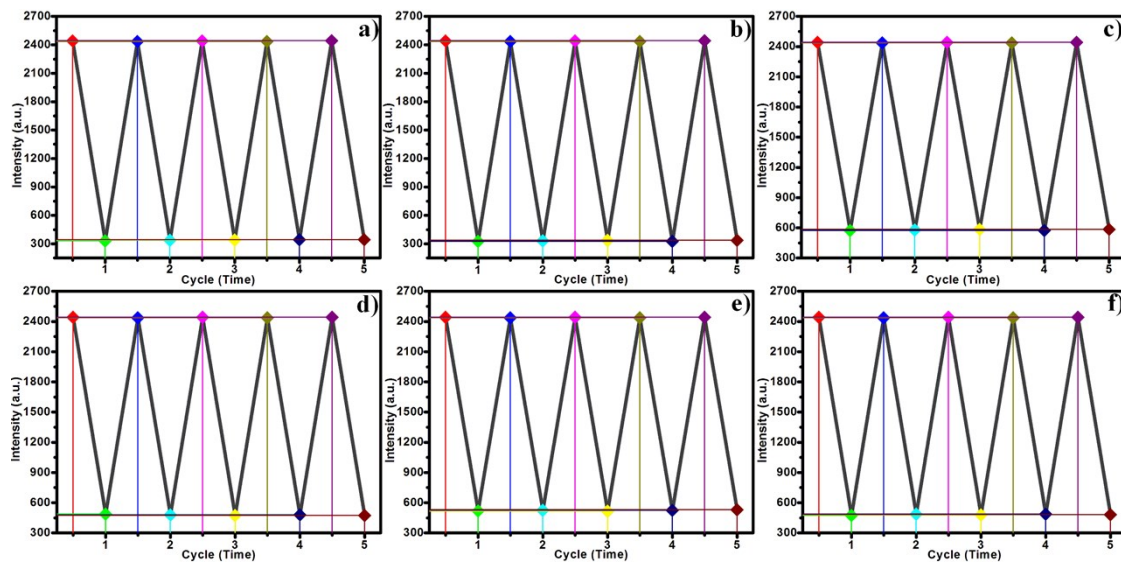

**Fig. S14** The changes of the emission intensity of **1** in 5 cycles sensing of 0.1 mM MND (a), DND (b), OND (c), RND (d), NFT (e), and NFZ (f).

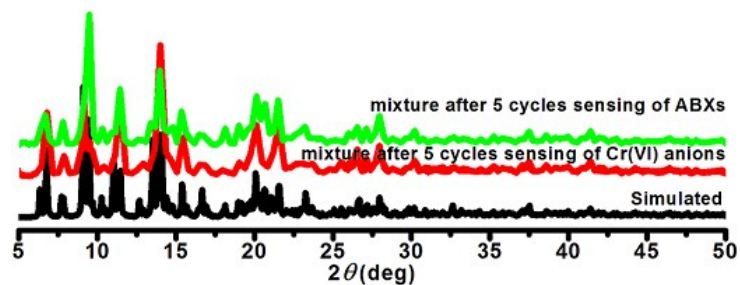

**Fig. S15** PXR D patterns of the mixture of **1** after 5 cycles sensing of Cr(VI) anions and nitro-containing ABXs in aqueous solutions.

5

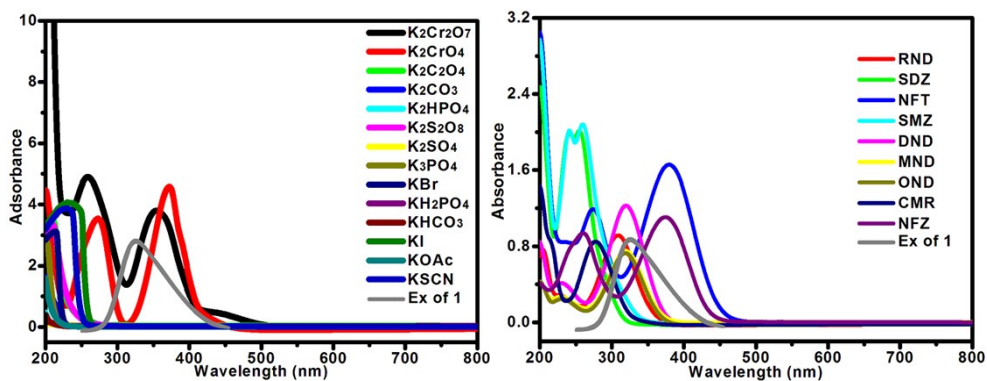

**Fig. S16** The UV-Vis absorbance spectra of anions and ABXs in aqueous solution and the excitation spectra of **1**.

**Table S1.** Selected bond lengths (Å) and angles (°) in **1**.

| Selected bond lengths (Å) |            |                          |            |                                         |            |
|---------------------------|------------|--------------------------|------------|-----------------------------------------|------------|
| Cd1-O12                   | 2.402(3)   | Cd2-O6                   | 2.215(3)   | Cd3-O7 <sup>ii</sup>                    | 2.364(3)   |
| Cd1-O24                   | 2.199(3)   | Cd2-O13                  | 2.437(3)   | Cd3-O26 <sup>ii</sup>                   | 2.389(3)   |
| Cd1-O25                   | 2.355(3)   | Cd2-O21                  | 2.361(3)   | Cd3-O29                                 | 2.207(3)   |
| Cd1-O36                   | 2.286(5)   | Cd2-O28 <sup>i</sup>     | 2.466(4)   | Cd3-O42                                 | 2.330(5)   |
| Cd1-N8                    | 2.319(4)   | Cd2-N3                   | 2.287(4)   | Cd3-N5                                  | 2.332(4)   |
| Cd1-N9                    | 2.380(4)   | Cd2-N15                  | 2.337(4)   | Cd3-N10                                 | 2.392(4)   |
| Cd4-O3                    | 2.202(3)   | Cd5-O1                   | 2.418(3)   | Cd6-O2                                  | 2.212(3)   |
| Cd4-O4                    | 2.443(3)   | Cd5-O5                   | 2.229(3)   | Cd6-O8                                  | 2.359(4)   |
| Cd4-O16                   | 2.333(3)   | Cd5-O16                  | 2.406(4)   | Cd6-O21 <sup>i</sup>                    | 2.462(3)   |
| Cd4-O23                   | 2.357(4)   | Cd5-O23                  | 2.437(3)   | Cd6-O28                                 | 2.415(4)   |
| Cd4-N2                    | 2.295(4)   | Cd5-N1                   | 2.289(4)   | Cd6-N4                                  | 2.273(4)   |
| Cd4-N24                   | 2.297(5)   | Cd5-N20                  | 2.333(5)   | Cd6-N22                                 | 2.358(5)   |
| Cd7-O31                   | 2.272(3)   | Cd8-O14 <sup>iv</sup>    | 2.370(4)   | Cd8A-O14 <sup>iv</sup>                  | 2.308(8)   |
| Cd7-O32                   | 2.294(4)   | Cd8-O15                  | 2.591(4)   | Cd8A-O15                                | 2.338(16)  |
| Cd7-O34                   | 2.142(8)   | Cd8-O17                  | 2.288(4)   | Cd8A-O17                                | 2.432(15)  |
| Cd7-O35 <sup>iii</sup>    | 2.303(4)   | Cd8-O27 <sup>iv</sup>    | 2.404(4)   | Cd8A-O27 <sup>iv</sup>                  | 2.348(10)  |
| Cd7-O44                   | 2.267(5)   | Cd8-O41                  | 2.416(5)   | Cd8A-N17                                | 2.10(2)    |
| Cd7-O46                   | 2.316(6)   | Cd8-N17                  | 2.328(5)   | Cd8A-N19                                | 2.67(2)    |
| Cd9-O9 <sup>i</sup>       | 2.284(4)   | Cd8-N19                  | 2.384(5)   | Cd11-O9 <sup>i</sup>                    | 2.331(7)   |
| Cd9-O11                   | 2.271(3)   | Cd10-O33                 | 2.221(4)   | Cd11-O11                                | 2.45(2)    |
| Cd9-O18 <sup>i</sup>      | 2.508(4)   | Cd10-O39                 | 2.202(4)   | Cd11-O18 <sup>i</sup>                   | 2.479(7)   |
| Cd9-O19                   | 2.480(4)   | Cd10-O40                 | 2.458(5)   | Cd11-O19                                | 2.180(16)  |
| Cd9-N18                   | 2.247(5)   | Cd10-O51                 | 2.313(7)   | Cd11-N18                                | 2.56(3)    |
| Cd9-N23                   | 2.405(5)   | Cd10-O52                 | 2.227(8)   | Cd11-N23                                | 2.163(17)  |
| Cd10A-O33                 | 2.319(5)   | Cd12-O43                 | 2.180(5)   |                                         |            |
| Cd10A-O39                 | 2.428(5)   | Cd12-O47                 | 2.13(3)    |                                         |            |
| Cd10A-O43                 | 2.473(6)   | Cd12-O49                 | 2.241(6)   |                                         |            |
| Cd10A-O51                 | 2.350(9)   | Cd12-O51                 | 2.350(9)   |                                         |            |
| Cd10A-O53                 | 1.972(11)  | Cd12-O53                 | 2.244(10)  |                                         |            |
| Selected bond angles (°)  |            |                          |            |                                         |            |
| O24-Cd1-O12               | 151.63(13) | O6-Cd2-O13               | 98.69(13)  | O7 <sup>ii</sup> -Cd3-O26 <sup>ii</sup> | 54.45(11)  |
| O24-Cd1-O25               | 100.89(14) | O6-Cd2-O21               | 85.45(13)  | O7 <sup>ii</sup> -Cd3-N10               | 96.76(13)  |
| O24-Cd1-O36               | 98.82(18)  | O6-Cd2-O28 <sup>i</sup>  | 79.67(13)  | O26 <sup>ii</sup> -Cd3-N10              | 141.63(14) |
| O24-Cd1-N8                | 99.93(15)  | O6-Cd2-N3                | 165.25(14) | O29-Cd3-O7 <sup>ii</sup>                | 152.59(13) |
| O24-Cd1-N9                | 107.67(14) | O6-Cd2-N15               | 118.91(14) | O29-Cd3-O26 <sup>ii</sup>               | 102.17(13) |
| O25-Cd1-O12               | 54.32(12)  | O13-Cd2-O28 <sup>i</sup> | 125.70(11) | O29-Cd3-O42                             | 99.31(19)  |
| O25-Cd1-N9                | 147.79(14) | O21-Cd2-O13              | 54.39(12)  | O29-Cd3-N5                              | 97.73(15)  |
| O36-Cd1-O12               | 79.06(17)  | O21-Cd2-O28 <sup>i</sup> | 71.50(12)  | O29-Cd3-N10                             | 110.39(14) |
| O36-Cd1-O25               | 107.58(19) | N3-Cd2-O13               | 90.97(14)  | O42-Cd3-O7 <sup>ii</sup>                | 80.46(18)  |
| O36-Cd1-N8                | 150.86(16) | N3-Cd2-O21               | 91.24(14)  | O42-Cd3-O26 <sup>ii</sup>               | 112.91(18) |
| O36-Cd1-N9                | 82.75(17)  | N3-Cd2-O28 <sup>i</sup>  | 85.64(14)  | O42-Cd3-N5                              | 150.58(17) |
| N8-Cd1-O12                | 94.36(14)  | N3-Cd2-N15               | 70.92(15)  | O42-Cd3-N10                             | 81.76(18)  |
| N8-Cd1-O25                | 90.52(15)  | N15-Cd2-O13              | 94.84(15)  | N5-Cd3-O7 <sup>ii</sup>                 | 94.98(14)  |
| N8-Cd1-N9                 | 70.40(14)  | N15-Cd2-O21              | 144.94(15) | N5-Cd3-O26 <sup>ii</sup>                | 86.48(15)  |
| N9-Cd1-O12                | 100.16(13) | N15-Cd2-O28 <sup>i</sup> | 133.75(15) | N5-Cd3-N10                              | 69.86(14)  |
| O3-Cd4-O4                 | 97.67(12)  | O1-Cd5-O23               | 122.72(11) | O2-Cd6-O8                               | 95.11(14)  |
| O3-Cd4-O16                | 82.28(13)  | O5-Cd5-O1                | 92.29(12)  | O2-Cd6-O21 <sup>i</sup>                 | 124.66(12) |
| O3-Cd4-O23                | 87.70(13)  | O5-Cd5-O16               | 90.17(13)  | O2-Cd6-O28                              | 87.98(14)  |
| O3-Cd4-N2                 | 167.94(14) | O5-Cd5-O23               | 77.90(13)  | O2-Cd6-N4                               | 162.34(15) |
| O3-Cd4-N24                | 111.06(17) | O5-Cd5-N1                | 157.74(14) | O2-Cd6-N22                              | 118.25(16) |
| O16-Cd4-O4                | 126.55(12) | O5-Cd5-N20               | 118.01(15) | O8-Cd6-O21 <sup>i</sup>                 | 124.66(12) |

|                                       |            |                                          |            |                                           |            |
|---------------------------------------|------------|------------------------------------------|------------|-------------------------------------------|------------|
| O16-Cd4-O23                           | 72.47(12)  | O16-Cd5-O1                               | 53.71(11)  | O8-Cd6-O28                                | 54.02(12)  |
| O23-Cd4-O4                            | 54.14(11)  | O16-Cd5-O23                              | 69.84(11)  | O28-Cd6-O21 <sup>i</sup>                  | 70.70(12)  |
| N2-Cd4-O4                             | 93.65(14)  | N1-Cd5-O1                                | 53.71(11)  | N4-Cd6-O8                                 | 98.75(14)  |
| N2-Cd4-O16                            | 86.57(14)  | N1-Cd5-O16                               | 69.84(11)  | N4-Cd6-O21 <sup>i</sup>                   | 83.71(14)  |
| N2-Cd4-O23                            | 93.34(14)  | N1-Cd5-O23                               | 80.88(14)  | N4-Cd6-O28                                | 91.32(14)  |
| N2-Cd4-N24                            | 71.35(17)  | N1-Cd5-N20                               | 70.67(15)  | N4-Cd6-N22                                | 70.43(16)  |
| N24-Cd4-O4                            | 107.70(18) | N20-Cd5-O1                               | 107.25(16) | N22-Cd6-O8                                | 98.61(18)  |
| N24-Cd4-O16                           | 122.56(17) | N20-Cd5-O16                              | 148.20(16) | N22-Cd6-O21 <sup>i</sup>                  | 132.68(16) |
| N24-Cd4-O23                           | 156.45(19) | N20-Cd5-O23                              | 127.33(16) | N22-Cd6-O28                               | 145.32(18) |
| O31-Cd7-O32                           | 863.83(14) | O14 <sup>iv</sup> -Cd8-O15               | 117.98(13) | O14 <sup>iv</sup> -Cd8A-O15               | 132.6(8)   |
| O31-Cd7-O35 <sup>iii</sup>            | 173.96(16) | O14 <sup>iv</sup> -Cd8-O27 <sup>iv</sup> | 54.62(12)  | O14 <sup>iv</sup> -Cd8A-O17               | 153.0(15)  |
| O31-Cd7-O46                           | 90.6(2)    | O14 <sup>iv</sup> -Cd8-N19               | 88.36(15)  | O14 <sup>iv</sup> -Cd8A-O27 <sup>iv</sup> | 56.1(2)    |
| O32-Cd7-O35 <sup>iii</sup>            | 87.95(15)  | O17-Cd8-O14 <sup>iv</sup>                | 163.35(15) | O14 <sup>iv</sup> -Cd8A-N19               | 83.2(5)    |
| O32-Cd7-O46                           | 93.1(2)    | O17-Cd8-O15                              | 53.08(12)  | O15-Cd8A-O17                              | 54.81(19)  |
| O34-Cd7-O31                           | 87.63(17)  | O17-Cd8-O27 <sup>iv</sup>                | 108.76(14) | O15-Cd8A-O27 <sup>iv</sup>                | 85.1(3)    |
| O34-Cd7-O32                           | 86.74(17)  | O17-Cd8-O41                              | 74.64(17)  | O15-Cd8A-N19                              | 144.3(5)   |
| O34-Cd7-O35 <sup>iii</sup>            | 89.04(17)  | O17-Cd8-N17                              | 98.49(16)  | O17-Cd8A-N19                              | 93.7(8)    |
| O34-Cd7-O44                           | 93.5(2)    | O17-Cd8-N19                              | 105.72(16) | O27 <sup>iv</sup> -Cd8A-O17               | 105.9(7)   |
| O34-Cd7-O46                           | 178.2(2)   | O27 <sup>iv</sup> -Cd8-O15               | 78.66(13)  | O27 <sup>iv</sup> -Cd8A-N19               | 123.4(11)  |
| O35 <sup>iii</sup> -Cd7-O46           | 92.7(2)    | O27 <sup>iv</sup> -Cd8-O41               | 78.31(18)  | N17-Cd8A-O14 <sup>iv</sup>                | 102.9(6)   |
| O44-Cd7-O31                           | 90.80(16)  | O41-Cd8-O15                              | 110.06(17) | N17-Cd8A-O15                              | 99.0(10)   |
| O44-Cd7-O32                           | 177.61(16) | N17-Cd8-O14 <sup>iv</sup>                | 94.63(15)  | N17-Cd8A-O17                              | 100.6(3)   |
| O44-Cd7-O35 <sup>iii</sup>            | 94.44(17)  | N17-Cd8-O15                              | 86.62(15)  | N17-Cd8A-O27 <sup>iv</sup>                | 149.9(13)  |
| O44-Cd7-O46                           | 86.6(3)    | N17-Cd8-O27 <sup>iv</sup>                | 130.63(15) | N17-Cd8A-N19                              | 67.9(3)    |
| O9 <sup>i</sup> -Cd9-O18 <sup>i</sup> | 54.29(12)  | N17-Cd8-O41                              | 150.00(19) | O9 <sup>i</sup> -Cd11-O11                 | 123.2(11)  |
| O9 <sup>i</sup> -Cd9-O19              | 130.68(15) | N17-Cd8-N19                              | 70.03(17)  | O9 <sup>i</sup> -Cd11-O18 <sup>i</sup>    | 54.21(17)  |
| O9 <sup>i</sup> -Cd9-N23              | 83.72(14)  | N19-Cd8-O15                              | 146.55(15) | O9 <sup>i</sup> -Cd11-N18                 | 102.3(10)  |
| O11-Cd9-O9 <sup>i</sup>               | 135.10(15) | N19-Cd8-O27 <sup>iv</sup>                | 134.74(15) | O11-Cd11-O18 <sup>i</sup>                 | 81.7(5)    |
| O11-Cd9-O18 <sup>i</sup>              | 84.77(13)  | N19-Cd8-O41                              | 83.6(2)    | O11-Cd11-N18                              | 84.6(11)   |
| O11-Cd9-O19                           | 54.71(13)  | O33-Cd10-O40                             | 93.38(16)  | O18 <sup>i</sup> -Cd11-N18                | 135.8(16)  |
| O11-Cd9-N23                           | 139.12(17) | O33-Cd10-O51                             | 88.1(2)    | O19-Cd11-O9 <sup>i</sup>                  | 147.4(11)  |
| O19-Cd9-O18 <sup>i</sup>              | 88.72(14)  | O33-Cd10-O52                             | 85.3(2)    | O19-Cd11-O11                              | 56.0(3)    |
| N18-Cd9-O9 <sup>i</sup>               | 114.41(17) | O39-Cd10-O33                             | 172.04(19) | O19-Cd11-O18 <sup>i</sup>                 | 96.7(5)    |
| N18-Cd9-O11                           | 96.61(17)  | O39-Cd10-O40                             | 92.99(16)  | O19-Cd11-N18                              | 109.8(6)   |
| N18-Cd9-O18 <sup>i</sup>              | 157.73(19) | O39-Cd10-O51                             | 88.7(2)    | N23-Cd11-O9 <sup>i</sup>                  | 88.2(4)    |
| N18-Cd9-O19                           | 110.28(17) | O39-Cd10-O52                             | 99.6(2)    | N23-Cd11-O11                              | 143.2(6)   |
| N18-Cd9-N23                           | 70.58(19)  | O51-Cd10-O40                             | 76.9(2)    | N23-Cd11-O18 <sup>i</sup>                 | 135.1(10)  |
| N23-Cd9-O18 <sup>i</sup>              | 121.73(16) | O52-Cd10-O40                             | 88.5(2)    | N23-Cd11-O19                              | 108.6(11)  |
| N23-Cd9-O19                           | 92.42(17)  | O52-Cd10-O51                             | 163.5(3)   | N23-Cd11-N18                              | 68.9(4)    |
| O43-Cd12-O49                          | 160.7(3)   | O33-Cd10A-O39                            | 136.7(2)   |                                           |            |
| O43-Cd12-O51                          | 92.5(3)    | O33-Cd10A-O43                            | 163.2(2)   |                                           |            |
| O43-Cd12-O53                          | 86.0(3)    | O33-Cd10A-O51                            | 84.7(2)    |                                           |            |
| O47-Cd12-O43                          | 86.4(6)    | O39-Cd10A-O43                            | 54.49(17)  |                                           |            |
| O47-Cd12-O49                          | 99.7(6)    | O51-Cd10A-O39                            | 82.5(2)    |                                           |            |
| O47-Cd12-O51                          | 81.2(8)    | O51-Cd10A-O43                            | 85.2(2)    |                                           |            |
| O47-Cd12-O53                          | 142.7(9)   | O53-Cd10A-O33                            | 100.0(3)   |                                           |            |
| O49-Cd12-O51                          | 106.5(3)   | O53-Cd10A-O39                            | 107.4(3)   |                                           |            |
| O49-Cd12-O53                          | 78.1(3)    | O53-Cd10A-O43                            | 84.7(3)    |                                           |            |
| O53-Cd12-O51                          | 135.5(3)   | O53-Cd10A-O51                            | 157.5(3)   |                                           |            |

Symmetry codes: i  $-x, 1-y, -z$ ; ii  $x, y, -1+z$ ; iii  $1-x, 2-y, 1-z$ ; iv  $-x, 1-y, 1-z$ .



**Table S2.** Comparison of various CPs sensors for the detection of  $\text{Cr}_2\text{O}_7^{2-}$  ion.

|   | Analyte                      | CPs based Fluorescent Materials                         | Quenching constant ( $K_{SV}, \text{M}^{-1}$ ) | Detection Limits (LOD)         | Media                | Ref |
|---|------------------------------|---------------------------------------------------------|------------------------------------------------|--------------------------------|----------------------|-----|
| 1 | $\text{Cr}_2\text{O}_7^{2-}$ | $[\text{Co}_{1.5}(\text{TBIP})_{1.5}(\text{L})]$        | $2.09 \times 10^4$                             | 0.099 $\mu\text{M}$            | $\text{H}_2\text{O}$ | 37  |
| 2 |                              | $[\text{Cd}_3\{\text{Ir}(\text{ppy}-\text{COO})_3\}_2]$ | $3.475 \times 10^4$                            | 145.1 ppb                      | $\text{H}_2\text{O}$ | 38  |
| 3 |                              | $[\text{Zn}_7(\text{TPPE})_2(\text{SO}_4)_7]$           | $1.09 \times 10^4$                             | 26.98 ppb                      | $\text{H}_2\text{O}$ | 39  |
| 4 |                              | $[\text{Cd}_3(\text{L})(\text{NTB})_2]$                 | $3.0 \times 10^4$                              | $5.3 \times 10^{-5} \text{ M}$ | $\text{H}_2\text{O}$ | 40  |
| 5 |                              | $[\text{Cd}_2(\text{L1})(1,4\text{-NDC})_2]$            | $5.86 \times 10^4$                             | 0.031 ppm                      | $\text{H}_2\text{O}$ | 41  |
| 6 |                              | $[\text{Cd}(\text{TIPA})_2(\text{ClO}_4)_2]$            | $7.15 \times 10^4$                             | 8 ppb                          | $\text{H}_2\text{O}$ | 42  |

**Table S3.** Comparison of various CPs sensors for the detection of nitro-containing ABXs.

|   | Analyte  | CPs based Fluorescent Materials      | Quenching constant ( $K_{SV}, \text{M}^{-1}$ ) | Detection Limits (LOD) | Media                | Ref |
|---|----------|--------------------------------------|------------------------------------------------|------------------------|----------------------|-----|
| 1 | NFT      | $[\text{Zn}(\text{L})(\text{aip})]$  | N/A                                            | 100 ppm                | $\text{H}_2\text{O}$ | 48  |
| 2 |          | $[\text{Zn}(\text{L})(\text{ip})]$   | N/A                                            | 80 ppm                 | $\text{H}_2\text{O}$ |     |
| 3 |          | $[\text{Zn}(\text{L})(\text{HBTC})]$ | N/A                                            | 45 ppm                 | $\text{H}_2\text{O}$ |     |
| 4 |          | $[\text{Mg}_2(\text{APDA})_2]$       | $8.82 \times 10^4$                             | 126 ppb                | $\text{H}_2\text{O}$ | 49  |
| 5 |          | $[\text{Cd}_3(\text{CBCD})_2]$       | $6.39 \times 10^4$                             | N/A                    | $\text{H}_2\text{O}$ | 51  |
| 6 |          | $[\text{Cd}_3(\text{TDCPB})]$        | $1.05 \times 10^5$                             | N/A                    | $\text{H}_2\text{O}$ | 52  |
| 1 | NFZ      | $[\text{Zn}(\text{L})(\text{aip})]$  | N/A                                            | 80 ppm                 | $\text{H}_2\text{O}$ | 48  |
| 2 |          | $[\text{Zn}(\text{L})(\text{ip})]$   | N/A                                            | 40 ppm                 | $\text{H}_2\text{O}$ |     |
| 3 |          | $[\text{Zn}(\text{L})(\text{HBTC})]$ | N/A                                            | 25 ppm                 | $\text{H}_2\text{O}$ |     |
| 4 |          | $[\text{Mg}_2(\text{APDA})_2]$       | $9.00 \times 10^4$                             | 108 ppb                | $\text{H}_2\text{O}$ | 49  |
| 5 |          | $[\text{Cd}_3(\text{CBCD})_2]$       | $9.72 \times 10^4$                             | N/A                    | $\text{H}_2\text{O}$ | 51  |
| 6 |          | $[\text{Cd}_3(\text{TDCPB})]$        | $7.46 \times 10^4$                             | N/A                    | $\text{H}_2\text{O}$ | 52  |
| 1 | OND      | $[\text{Cd}_3(\text{DBPT})_2]$       | $2.4 \times 10^4$                              | 1.10 ppm               | $\text{H}_2\text{O}$ | 50  |
| 1 | MND      | $[\text{Cd}_3(\text{DBPT})_2]$       | $2.0 \times 10^4$                              | 1.71 ppm               | $\text{H}_2\text{O}$ | 50  |
| 1 | DMZ      | $[\text{Cd}_3(\text{DBPT})_2]$       | $1.7 \times 10^4$                              | 1.41 ppm               | $\text{H}_2\text{O}$ | 50  |
| 1 | 2-M-5-MZ | $[\text{Cd}_3(\text{DBPT})_2]$       | $1.1 \times 10^4$                              | 1.27 ppm               | $\text{H}_2\text{O}$ | 50  |
